# Supplementary material for: Highly microporous polymer-based carbons for CO2 and H2 adsorption
Source: Royal Society of Chemistry journal article supplement (doi:10.1039/c3ra47278g), 2014-01-01
Supplement: c3ra47278g1.pdf [file c3ra47278g1.pdf]

## Highly Microporous Polymer-Based Carbons for CO<sub>2</sub> and H<sub>2</sub> Adsorption

Jerzy Choma,<sup>a</sup> Łukasz Osuchowski,<sup>b</sup> Michał Marszewski,<sup>c</sup> and Mietek Jaroniec<sup>c\*</sup>

<sup>a</sup> Institute of Chemistry, Military University of Technology, 00-098 Warsaw, Poland

<sup>b</sup> Military Institute of Chemistry and Radiometry, 00-910 Warsaw, Poland

<sup>c</sup> Department of Chemistry and Biochemistry, Kent State University, Kent, Ohio 44242, United States

\* Corresponding author: Mietek Jaroniec, Department of Chemistry and Biochemistry, Kent State University, Kent, OH 44242, USA. Fax: +1 (330) 672-3816; Tel: +1 (330) 672-2032; e-mail: jaroniec@kent.edu

**Table S1.** Structural parameters for the carbons studied.<sup>a</sup>

| Carbon | V <sub>t</sub><br>(cm <sup>3</sup> g <sup>-1</sup> ) | V <sup>as</sup> <sub>mi1</sub><br>(cm <sup>3</sup> g <sup>-1</sup> ) | V <sup>as</sup> <sub>mi2</sub><br>(cm <sup>3</sup> g <sup>-1</sup> ) | V <sup>as</sup> <sub>me</sub><br>(cm <sup>3</sup> g <sup>-1</sup> ) | S <sup>as</sup> <sub>ext</sub><br>(m <sup>2</sup> g <sup>-1</sup> ) | w <sup>KJS</sup> <sub>mi2</sub><br>(nm) | w <sup>KJS</sup> <sub>me</sub><br>(nm) |
|--------|------------------------------------------------------|----------------------------------------------------------------------|----------------------------------------------------------------------|---------------------------------------------------------------------|---------------------------------------------------------------------|-----------------------------------------|----------------------------------------|
| C      | 0.12                                                 | 0.01                                                                 | 0.08                                                                 | 0.04                                                                | 0.7                                                                 | 0.88                                    | 1.77                                   |
| C-1    | 0.44                                                 | 0.07                                                                 | 0.30                                                                 | 0.14                                                                | 8.7                                                                 | 0.78                                    | 2.19                                   |
| C-2    | 0.83                                                 | 0.19                                                                 | 0.64                                                                 | 0.19                                                                | 18.5                                                                | 0.76                                    | 1.92                                   |
| C-3    | 1.70                                                 | 0.27                                                                 | 1.28                                                                 | 0.42                                                                | 35.6                                                                | 0.79                                    | 2.03                                   |
| C-4    | 2.07                                                 | 0.31                                                                 | 1.59                                                                 | 0.48                                                                | 33.4                                                                | 0.78                                    | 2.07                                   |
| C-5    | 1.95                                                 | 0.22                                                                 | 1.47                                                                 | 0.48                                                                | 28.5                                                                | 0.78                                    | 2.20                                   |
| C-6    | 1.54                                                 | 0.14                                                                 | 1.18                                                                 | 0.36                                                                | 12.3                                                                | 0.79                                    | 2.25                                   |

<sup>a</sup> C – carbon, C-X – X denotes the KOH/carbon weight ratio; V<sub>t</sub> – total (single-point) pore volume obtained from the amount adsorbed at p/p<sub>0</sub> ≈ 0.99; V<sup>as</sup><sub>mi1</sub> – volume of small micropores (roughly corresponds to the volume of ultramicropores; pores < 0.75 nm) obtained on the basis of α<sub>s</sub> method in the range of 0.25 – 0.5; V<sup>as</sup><sub>mi2</sub> – volume of all micropores (pores < 2 nm) and very small mesopores obtained on the basis of basis of α<sub>s</sub> method in the range of 0.9 – 1.3; V<sup>as</sup><sub>me</sub> – volume of mesopores obtained by subtracting V<sup>as</sup><sub>mi2</sub> from V<sub>t</sub>; S<sup>as</sup><sub>ext</sub> – external surface area obtained on the basis of basis of α<sub>s</sub> method in the range of 3 – 8; w<sup>KJS</sup><sub>mi2</sub> – micropore width obtained by the KJS method; w<sup>KJS</sup><sub>me</sub> – mesopore width obtained by the KJS method.

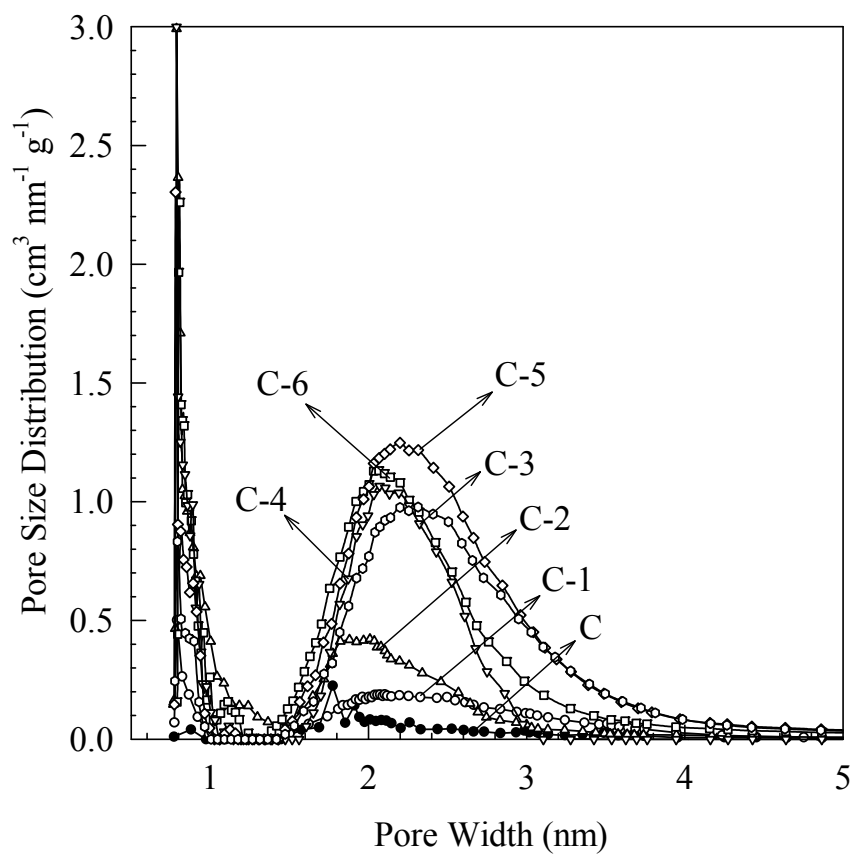

**Figure S1.** Pore size distribution functions, calculated by the KJS method, for the carbon material C, and the activated carbons: C-1, C-2, C-3, C-4, C-5, and C-6.

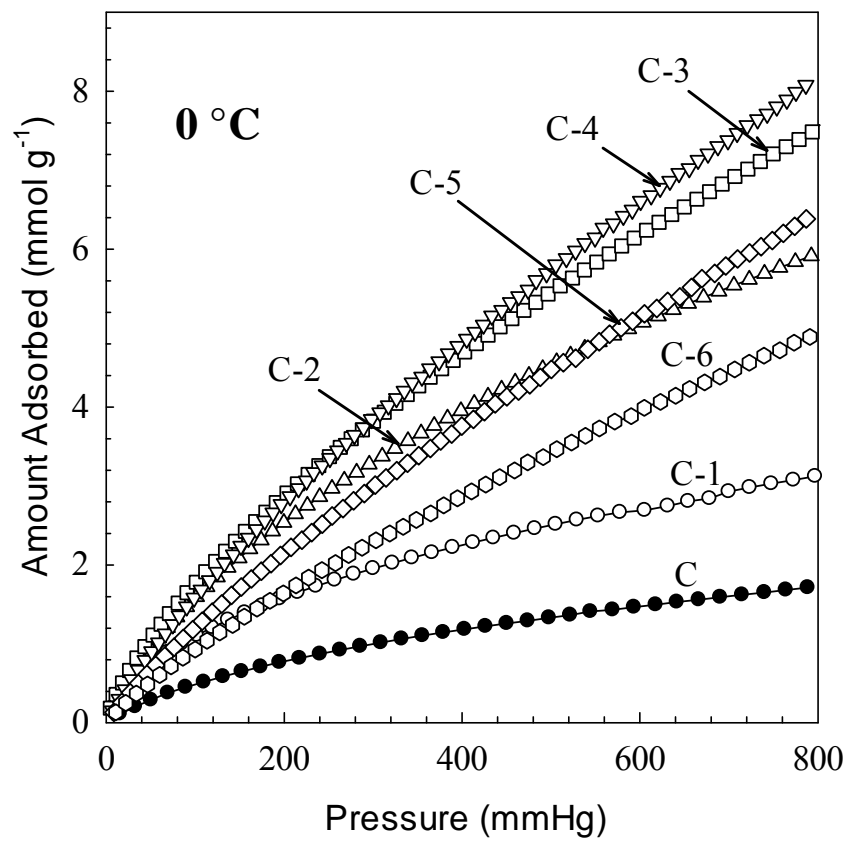

**Figure S2.** CO<sub>2</sub> adsorption isotherms measured at 0 °C for all carbon materials.

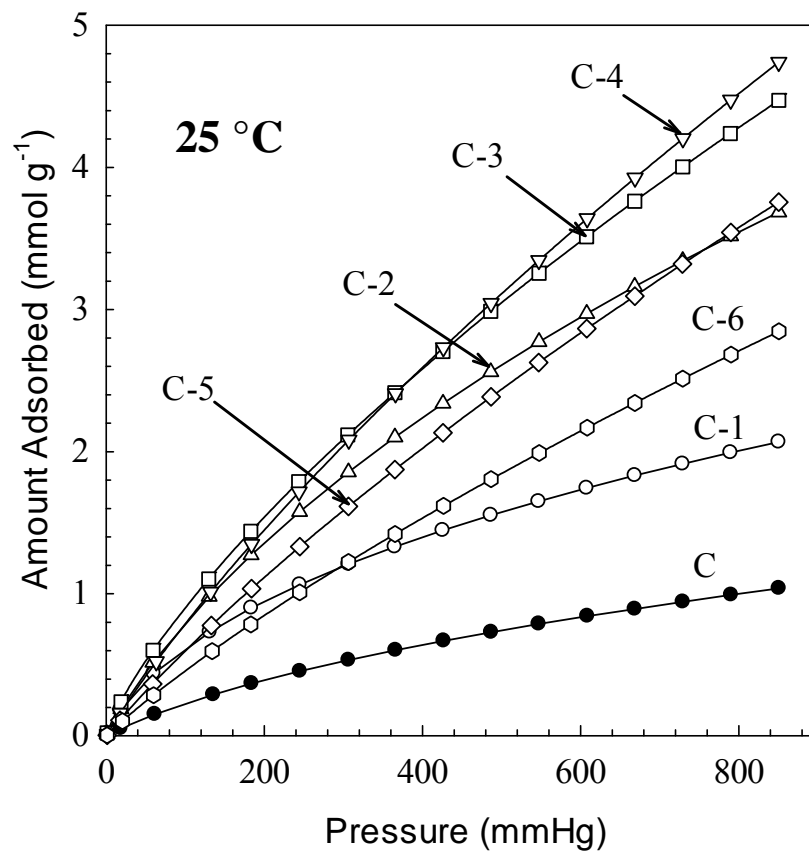

**Figure S3.** CO<sub>2</sub> adsorption isotherms measured at 25 °C for all carbon materials.

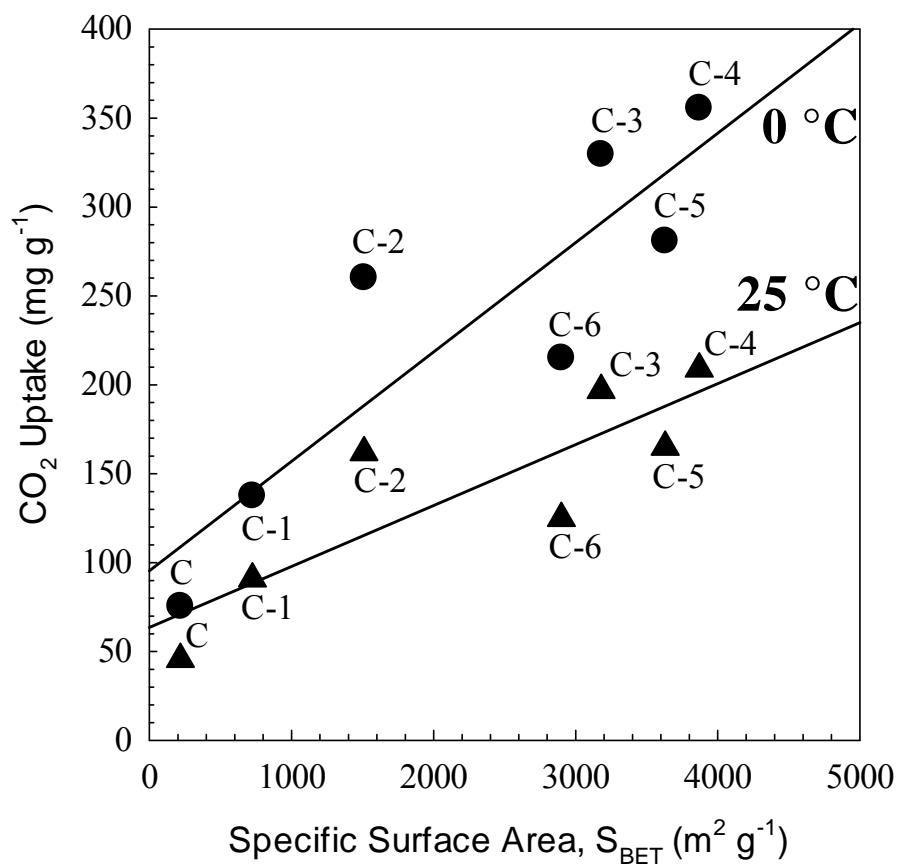

**Figure S4.**  $\text{CO}_2$  uptake at 0 °C, 800 mmHg and 25 °C, 850 mmHg as a function of the specific surface area  $S^{\text{BET}}$  for all carbon materials.

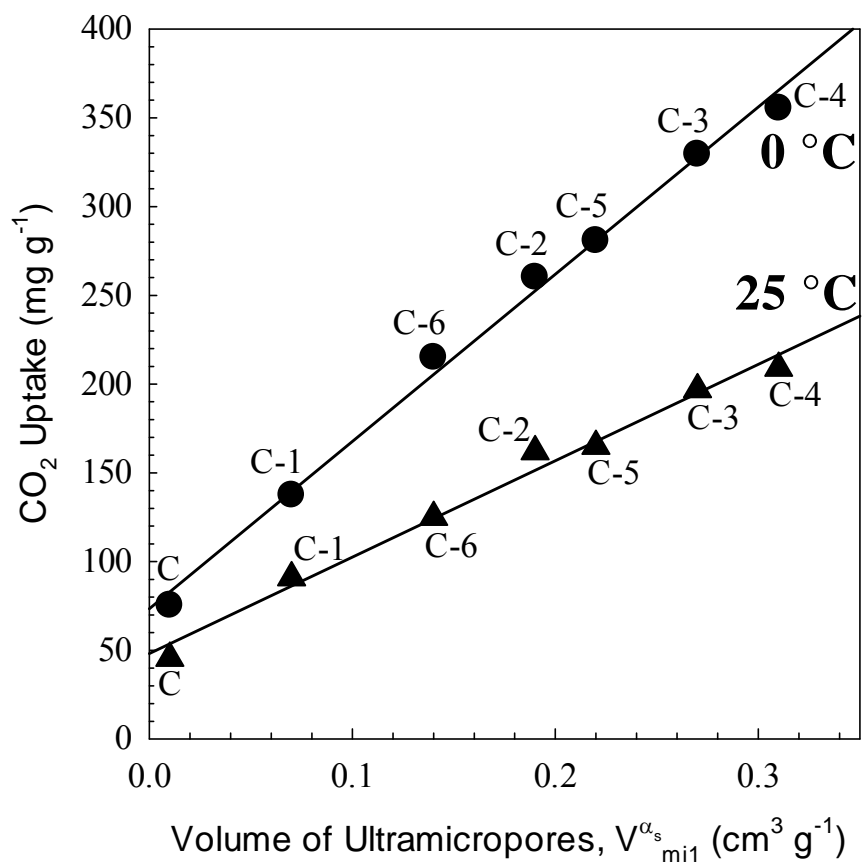

**Figure S5.** CO<sub>2</sub> uptake at 0 °C, 800 mmHg and 25 °C, 850 mmHg as a function of the ultramicropore volume  $V_{mi1}^{\alpha s}$  for all carbon materials.

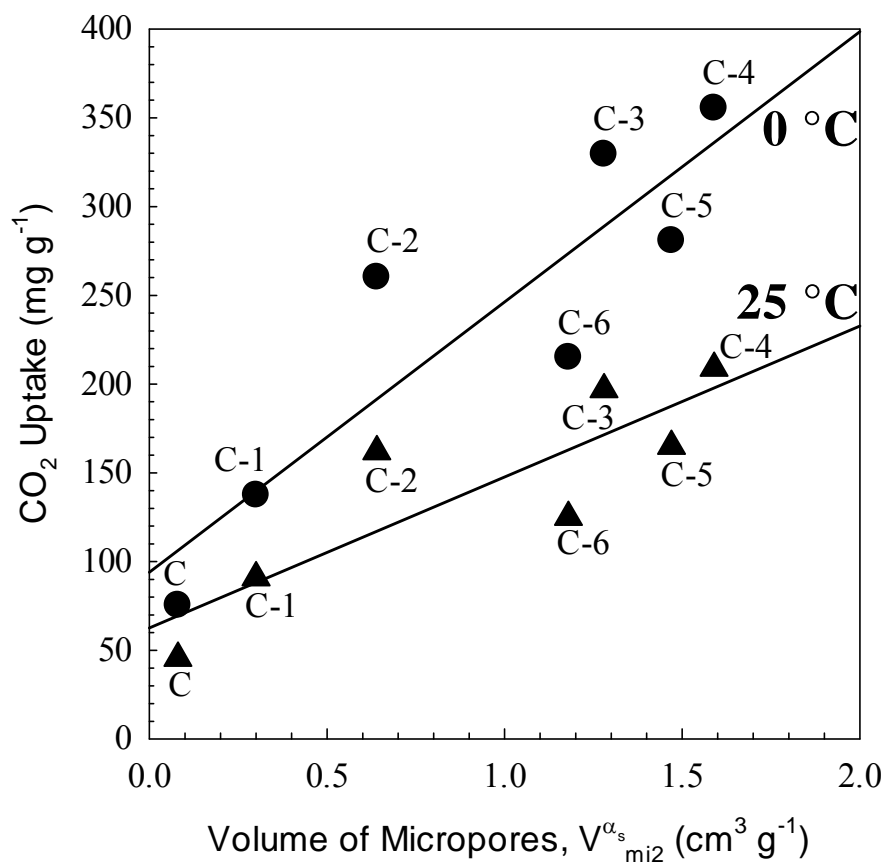

**Figure S6.** CO<sub>2</sub> uptake at 0 °C, 800 mmHg and 25 °C, 850 mmHg as a function of the micropore volume  $V_{mi2}^{\alpha_s}$  (obtained by  $\alpha_s$  method in the range of  $\alpha_s = 0.9 \div 1.3$ ) for all carbon materials.

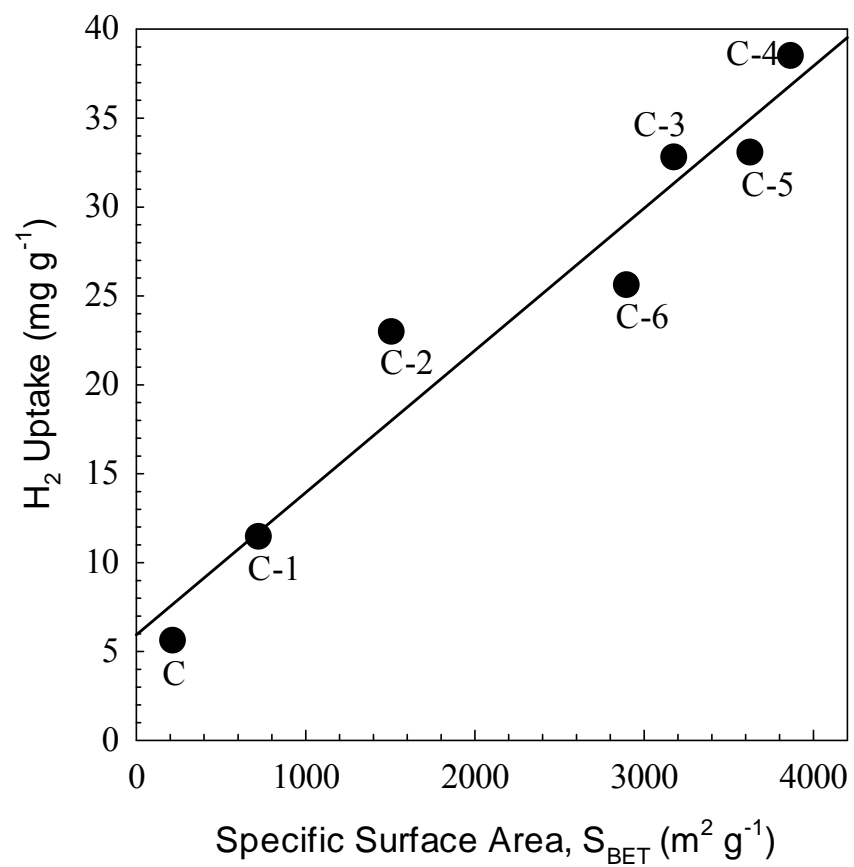

**Figure S7.** H<sub>2</sub> uptake at -196 °C and 850 mmHg as a function of the specific surface area S<sup>BET</sup> for all carbon materials.



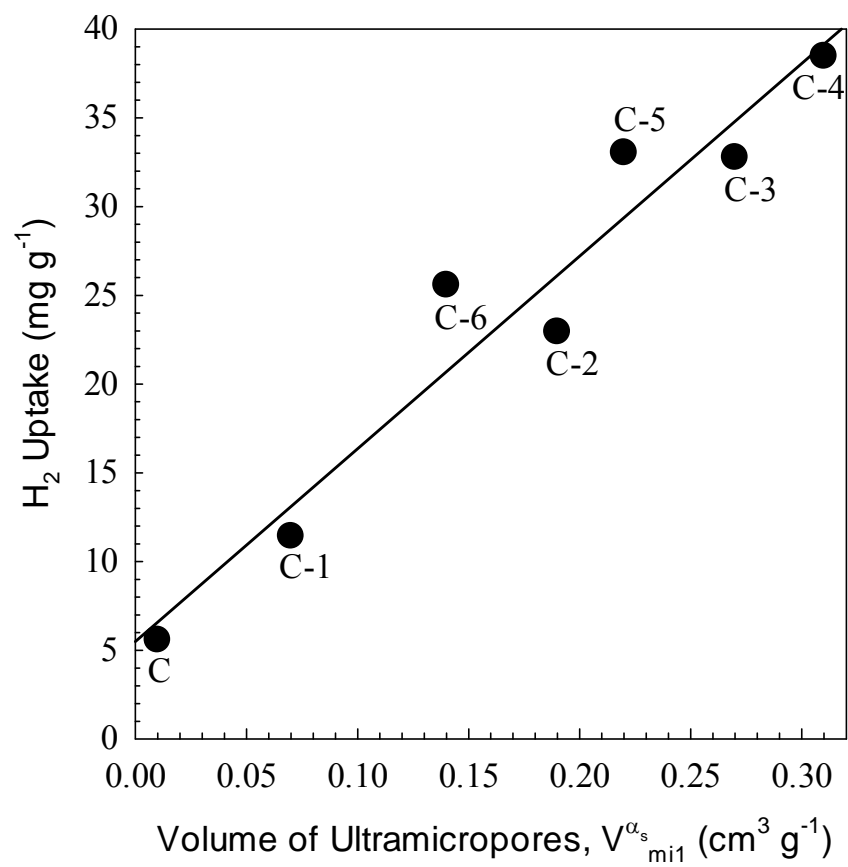

**Figure S8.** H<sub>2</sub> uptake at -196 °C and 850 mmHg as a function of the volume of ultramicropores

V<sub>mi1</sub><sup>α<sub>s</sub></sup> (obtained by α<sub>s</sub> method in the range of α<sub>s</sub> = 0.25 ÷ 0.50) for all carbon materials.

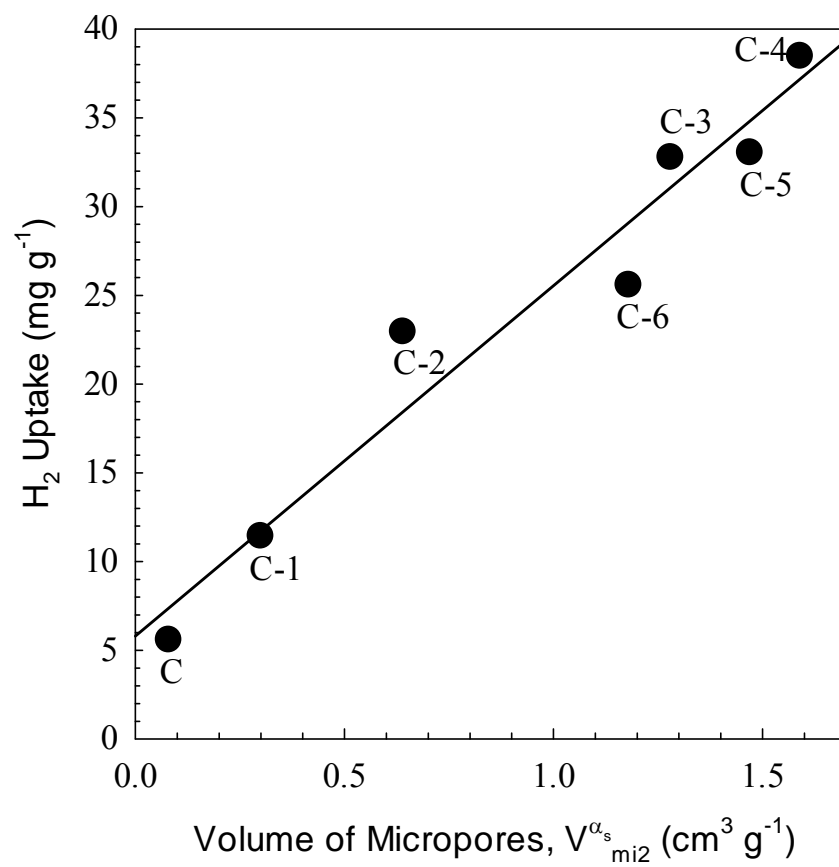

**Figure S9.** H<sub>2</sub> uptake at -196 °C and 850 mmHg as a function of the volume of micropores

V<sub>mi2</sub><sup>α<sub>s</sub></sup> (obtained by α<sub>s</sub> method in the range of α<sub>s</sub> = 0.9 ÷ 1.3) for all carbon materials.
